# Supplementary material for: Internet of things–Enabled technologies as an intervention for childhood obesity: A systematic review
Source: PLOS Digit Health. 2022 Apr 7;1(4):e0000024. doi: 10.1371/journal.pdig.0000024 (PMC9931243; doi:10.1371/journal.pdig.0000024)
Supplement: S3 Table — (XLSX) [file pdig.0000024.s005.xlsx]

## Sheet: Sheet1
Stakeholders	Infants / Children / teenagers														Family / caregivers						School	Technical support service	Researchers		Health educator	Hospital/ Weight management clinics/ Health professionals						Service/ community partners	National health agency/ Public health officials
Use cases	Monitor screen time (TV, video game, phone)	Sleep pattern monitoring	Coach and motivate users	Dietary behavior monitoring	Food advertisement monitoring	Snacking behavior monitoring	Improve dietary habits	Coaching with educational feedback	Challenges and games for engaging users	Physical activity monitoring	Improve physical activity level	Improve fitness/ health	Obesity and eating disorder prevention	Health counselling	Monitor family mealtime without compromising privacy	Monitor child dietary habits	Monitor child physical activity level	Encourage positive feeding behavior through communication or push notifications	Improve physical activity of child	Health counselling	Encourage positive behavior	Troubleshoot service	Anonymous monitoring of user behavior and control parameters of study	Snacking behavior monitoring	Monitor and analyse user diet and encourage positive behavior	Set up the nutrition and exercise targtets for the kids	Risk and goal proximity estimation	Progress follow-up	Obesity and eating disorder prevention	Remote monitoring	Deliver secure and effective remote care	Sales of real services that can be purchased such as bike sharing, local cafe etc	Evidence-based policy change	Understand youth diet and physical activity level
Alahmadi 2013	*
Bi 2017	*														*
Caon 2018			*	*				*	*													*	*									*
De Cock 2016						*																		*
Delopoulos 2019		*		*	*					*																				*			*
Direito 2015											*	*
Garde 2015											*
Lindberg 2016											*
Lopez 2017							*				*															*		*
Lu 2013											*
Maramis 2014													*														*	*	*
Mendoza 2017											*												*
O'Malley 2014												*																			*
Phan 2018											*								*												*
Ridgers 2018											*												*								*
Svensson 2015				*						*																								*
Taki 2019							*											*
Turel 2016	*	*																												*
Yang 2017	*	*		*						*						*	*				*
Tripicchio 2017														*						*											*
Vazquez-Briseno, 2012				*												*		*							*
Alloghani, 2016												*				*	*	*												*	*
	4	3	1	5	1	1	2	1	1	3	8	3	1	1	1	3	2	3	1	1	1	1	3	1	1	1	1	2	1	3	5	1	1	1
