# Supplementary material for: Internet of things–Enabled technologies as an intervention for childhood obesity: A systematic review
Source: PLOS Digit Health. 2022 Apr 7;1(4):e0000024. doi: 10.1371/journal.pdig.0000024 (PMC9931243; doi:10.1371/journal.pdig.0000024)
Supplement: S5 Table — (XLSX) [file pdig.0000024.s007.xlsx]

## Sheet: Sheet1
						General information
Study ID	Study identification	Title	Author	Journal	Abstract	Year of study	Country	Target patient age group	Test sample size	Trial type	Length of Study	Behavorial change theory	Product	Type of device	Sensor type	Data collected	Data transfer method	User need	Stakeholders	Data analysis method	Researcher-reported effectiveness measures and outcomes	Mention of ethics	Mention of regulation
1	Alahmadi 2013	Electronic Monitor for Monitoring TV Viewing Time Description and Significance	Alahmadi, Mohammad Ali	cSPORTS 2013 - Proceedings of the International Congress on Sports Science Research and Technology Support	Sedentary behaviour is related to adverse cardiometabolic risk profiles and premature mortality. Television (TV) viewing time is the most predominant sedentary behaviour. There are also adverse associations between TV viewing time and a number of cardiovascular risk factors such as the metabolic syndrome, obesity, and abnormal glucose metabolism. Few measurement tools, such as direct observation …	2013	Saudi Arabia	Child	N/A	Protocol	N/A	Monitoring	RFID wrist watch	Wrist watch	RFID	TV viewing data	Non-contact radio-frequency	Monitor TV watching time	Children	N/A	N/A	N/A	N/A
2	Bi 2017	FamilyLog: A Mobile System for Monitoring Family Mealtime Activities.	Bi, Chongguang; Xing, Guoliang; Hao, Tian; Huh, Jina; Peng, Wei; Ma, Mengyan	Proceedings of the ... IEEE International Conference on Pervasive Computing and Communications. IEEE International Conference on Pervasive Computing and Communications	Research has shown that family mealtime plays a critical role in establishing good relationships among family members and maintaining their physical and mental health. In particular, regularly eating dinner as a family significantly reduces prevalence of obesity. However, American families with children spend only 1 hour on family meals while three hours watching TV on an average work day. Fine-g…	2017	US	Families with children	37 subjects in 8 families	Intervention study	77 days	Monitoring	FamilyLog	Smartphone and smart watches	built-in accelerometer, microphone	Arm gestures from wearables, eating sounds, environmental noise, conversations	system should process the collected sensor samples on the fly and only keep the results, instead of storing or transmitting any raw data, which may contain sensitive information such as contents of the conversations	Monitor family mealtime activities without compromising privacy	Family, children	Hidden Markov model-based classification	Precision (ratio of the number of true-positive windows to total number of windows), recall (number of true-positive windows divided by the total number of windows detected as family meals)	Approved by IRB at university	N/A
3	Caon 2018	Teenagers' Usage of a Mobile-Wearable-Cloud Platform to Promote Healthy Lifestyles: the PEGASO Experience*	Caon, M.; Carrino, S.; Angelini, L.; Khaled, O.A.; Mugellini, E.; Velickovski, F.; Andreoni, G.	2018 40th Annual International Conference of the IEEE Engineering in Medicine and Biology Society (EMBC)	In contemporary society, non-communicable diseases linked to unhealthy lifestyles, such as obesity, are on the rise with a major impact on global deaths. Prevention is the new frontier, promising to increase life expectancy and quality, while reducing costs related to healthcare. The PEGASO project developed a mobile ecosystem where the digital Companion aims at empowering teenagers in the adopti…	2018	Italy, Spain, United Kingdom	Teenagers	368	Pilot study	8 months 20 days	Rewards, Goal setting, positive reinforcement, monitoring, feedback	Smartphone based app connected to wearable smart bracelet and smart garment	Smartphone and wearables	smartphone: 3D inertial sensors, GPS, self-reported information smart bracelet: activity track and sleep monitoring smart garment: embedded textile electrodes for ECG, accelerometer and gyroscope	Physical activity, sleeping patterns, self-reported dietary patterns	- Secured cloud when connected to internet - BRIDGE system to connect with National Health system - user-managed data	Researchers: anonymous monitoring of user behavior and control parameters of study Technical support service: troubleshoot Teenagers: shows information to user to coach and motivate, dietary behavior monitoring and coaching with educational feedback, challenges to motivate users and games for engaging users for behavior-changing interventions PEGASO partners: real services that can be purchased s…	Teenagers, Researchers, PEGASO partners, tech support, physiology and nutrition experts	Virtual Individual Model (VIM) for characterizing user and personalisation	Subjective rating of product's usability using the System Usability Scale (SUS): 64.66 out of 100 Emotional outcomes of interaction between user and product using Emotional Metric Outcomes (EMO): 6.25 out of 10	Experimental procedures involving human subjects approved by institutional review boards in all countries involved	N/A
4	De Cock 2016	Feasibility and impact study of a reward-based mobile application to improve adolescents' snacking habits	De Cock, Nathalie; Van Lippevelde, Wendy; Vangeel, Jolien; Notebaert, Melissa; Beullens, Kathleen; Eggermont, Steven; Deforche, Benedicte; Maes, Lea; Goossens, Lien; Verbeken, Sandra; Moens, Ellen; Vervoort, Leentje; Braet, Caroline; Huybregts, Lieven; Kolsteren, Patrick; Van Camp, John; Lachat, Carl	PUBLIC HEALTH NUTRITION	Objective: Adolescents' snacking habits are driven by both explicit reflective and implicit hedonic processes. Hedonic pathways and differences in sensitivity to food rewards in addition to reflective determinants should be considered. The present study evaluated the feasibility and impact of a mobile phone-delivered intervention, incorporating explicit reflective and implicit rewarding strategie…	2016	Belgium	14-16 years old	988	Non-randomised clustered controlled trial	4 weeks	Rewards, Goal setting, positive reinforcement, exposure, monitoring, feedback, active learning, advanced organisers	"Snack Track School" app	mobile app	Self-report	snack intake	data logged in app, does not mention transfer method	Improve healthy snacks consumption	Adolescents, researchers	Statistical software package Stata version 13SE	- Healthy snack ratio - Awareness - Intention - Attitude taste - Attitude health - SAelf efficacy - Habit - Knowledge about healthiness of snacks	Approval for trial provided by university ethics committee, consent obtained from school authorities and parents	N/A
5	Delopoulos 2019	Big Data Against Childhood Obesity, the BigO Project	Delopoulos, A.	2019 IEEE 32nd International Symposium on Computer-Based Medical Systems (CBMS)	BigO (bigoprogram.eu) is an EU-funded project that collects objective evidence on the causes of obesity in local communities and helps public health authorities design effective counter obesity interventions. A novel technological platform is being built relying on mobile devices and sensors for data acquisition combined with big data analytics and visualization. During the 4 year project duratio…	2016-2020	Greece, Ireland, Sweden	9-18 years old	around 300	Pilot study	Ongoing since November 2018	Monitoring, policy change	BigO monitoring system	Android mobile app with a WearOS smartwatch	Accelerometer, gyroscope, HRV sensor, GPS, barcode scanning for food, self-report, photos of food and ads	Physical activity, eating, transportation, sleep, national and google databases measuring built, food and social environment, anthropomorphic individual data, users' perceptions around lifestyle and living environment	BigO Cloud Storage + analytics platform	Evidence-based policy change	Children, School, Public Health Officials, BigO community, Healthcare professionals	Signal processing algorithms, machine learning, deep learning	N/A	Local ethical authorities	Compliant with EU Directive 95/46/EC and GDPR
6	Direito 2015	Apps for IMproving FITness and Increasing Physical Activity Among Young People: The AIMFIT Pragmatic Randomized Controlled Trial	Direito, Artur; Jiang, Yannan; Whittaker, Robyn; Maddison, Ralph	BMC public health	BACKGROUND: Physical activity is a modifiable behavior related to many preventable non-communicable diseases. There is an age-related decline in physical activity levels in young people, which tracks into adulthood. Common interactive technologies such as smartphones, particularly employing immersive features, may enhance the appeal and delivery of interventions to increase levels of physical act…	2015	New Zealand	14-17	51	3-arm, parallel, RCT	8 weeks	Self-regulatory, monitoring, feedback	Zombies, Run! 5K training app, Get Running-Couch to 5k app	Mobile app	accelerometer, GPS	- Average daily valid use - Average daily activity counts - Average daily time spent in sedentary activities - Average daily time spent in light, moderate and vigorous physical activity	N/A	Improve fitness	Teenagers	Comparison with control group baseline, not connected to internet	- Time to complete 1-mile walk/run fitness test - Perceived enjoyment - Perceived competence, autonomy and relatedness - self-efficacy	Approval from university ethics board, consent from participants	CONSORT and CONSORT-eHealth extension
7	Garde 2015	Assessment of a Mobile Game (MobileKids Monster Manor") to Promote Physical Activity Among Children."	Garde, Ainara; Umedaly, Aryannah; Abulnaga, S.Mazdak; Robertson, Leah; Junker, Anne; Chanoine, Jean Pierre; Ansermino, J.Mark; Dumont, Guy A.	Games for health journal	OBJECTIVE: The majority of children in North America are not meeting current physical activity guidelines. The purpose of this study was to evaluate the impact of a mobile phone game (MobileKids Monster Manor") as a tool to promote voluntary physical activity among children.	2015	Canada	8-13	54	intervention study	2 weeks	Feedback with discrepancy assessment(individuals compare data on their behavior with goals and standards); Self-determination theory, monitoring	MobileKids Monster Manor mobile app, Tractivity activity monitor	mobile app + wearable	accelerometer	Number of steps per minute	wirelessly connected to phone	Improve physical activity level	Children	Data summarised as mean and standard deviation; Shapiro-Wilk normality test(a two way repeated-measure analysis of variance); linear regression	- intervention effect in activity - Enjoyment	Approval from university ethics board, consent from participants	N/A
8	Lindberg 2016	Enhancing Physical Education with Exergames and Wearable Technology	Lindberg, R.; Seo, J.; Laine, T.H.	IEEE Transactions on Learning Technologies	Increases in the numbers of obese and overweight children are a major issue in post-industrial societies because obesity can lead to severe health-related problems. In addition, many challenges affect the quantity and quality of physical education (PE) provided by schools. Exergames that combine exercise with gaming have been recognized as a possible method for motivating children to become physi…	2016	Korea	9	61	Evaluation study	several days over a period of one week	Exergame	RO2 mobile app, Microsoft Band, Near field communication tags (NFC tags)	mobile app + wearable + NFC tags	Mobile phone: Accelerometer, digital compass, barameter, RGB light, proximity, microphone, GPS Microsoft Band: optical heart rate, acceleromter/gyroscope, GPS, microphone, ambient light sensor, UV sensor, galvanic skin response	Physical activity, heart rate	client-server system where the server implemented using the Spring Framework	Improve physical activity level	Children	quantitative questionnaire data complemented with relevant insights captured from qualitative data	- Learning - Exercise efficiency - Motivation and engagement	Obtained permission at target school	N/A
9	Lopez 2017	MATCHuP: An mHealth Tool for Children and Young People Health Promotion	Lopez, Beatriz; Soung, Sreynoch; Mordvanyuk, Natalia; Pla, Albert; Gay, Pablo; Lopez-Bermejo, Abel	HEALTHINF 2017 - 10th International Conference on Health Informatics, Proceedings; Part of 10th International Joint Conference on Biomedical Engineering Systems and Technologies, BIOSTEC 2017	The kids of European and occidental countries are threatened by obesity. They are potential persons to become chronic patients. mHealth technology can help them to change their nutrition and physical activity habits. This paper presents MATCHuP, a platform that involves several agents (kids, parents, healthcare providers) that collaborate and compete by games in a social network in order to creat…	2017	Spain	5-16	N/A	N/A	N/A	Self-regulatory, monitoring, feedback, socialisation	MATCHup kids and parents app + wearable, web service for health professionals	mobile app + wearable, web service	Self-reported using mobile phone camera and self labelling	Kids meals, physical activity	Social network	Improve nutrition and exercise habits of obese kids. Health professionals to set up the nutrition and exercise targtets for the kids and follow up on progress.	Children, parents, health professionals	Cross-validation of photos by peers. In the future, use AI tools to improve the aggregation methods	N/A	N/A	N/A
10	Lu 2013	Reducing adolescent obesity with a mobile fitness application: Study results of youth age 15 to 17	Lu, F.; Turner, K.; Murphy, B.	2013 IEEE 15th International Conference on e-Health Networking, Applications and Services (Healthcom 2013)	We present the results of the second phase of a multiphase study into the feasibility of combating growing adolescent obesity rates with a fitness game deployed on mobile devices. The fitness application includes tracking software to measure and count exercises performed and socialization features to compete and collaborate with friends. In the first phase of our study we tested producing positiv…	2013	Canada	11-17	19	Intervention study	6 weeks	Monitoring, Gamification, positive encouragement, socialisation	UOIFit application	mobile app + sports armband to hold the device on arm	GPS, accelerometer	physical activity	Social network	Improve physical activity level	Adolescents	BMI	BMI reduction	N/A	N/A
11	Maramis 2014	Preventing Obesity and Eating Disorders through Behavioural Modifications: the SPLENDID Vision	Maramis, Christos; Diou, Christos; Ioakeimidis, Ioannis; Lekka, Irini; Dudnik, Gabriela; Mars, Monica; Maglaveras, Nikos; Bergh, Cecilia; Delopoulos, Anastasios	2014 EAI 4TH INTERNATIONAL CONFERENCE ON WIRELESS MOBILE COMMUNICATION AND HEALTHCARE (MOBIHEALTH)	Recent intensive research in the fields of obesity and eating disorders has proved most traditional interventions inadequate: The obesity-targeting interventions have either failed or are strongly social context dependent, while the interventions for eating disorders have poor results and high levels of relapse. On the contrary, recent randomized control trials have illustrated that supervised tr…	2014	Sweden	10-17 and young adults	N/A	N/A	N/A	Monitoring, feedback, goal-setting	SPLENDID system	Mobile app + Mandometer, Activity meter and chewing sensor	mandometer, triaxial accelerometer, chewing sensor	food weight on plate, physical activity, chewing patterns, snacking and constant eating detection	Bluetooth	Obesity and eating disorder prevention of adolescents and young adults, risk and goal proximity estimation, progress monitoring	Adolescents, young adults, health professionals	statistical machine learning techniques	N/A	N/A	N/A
12	Mendoza 2017	A Fitbit and Facebook mHealth intervention for promoting physical activity among adolescent and young adult childhood cancer survivors: A pilot study	Mendoza, Jason A.; Baker, K.Scott; Moreno, Megan A.; Whitlock, Kathryn; Abbey-Lambertz, Mark; Waite, Alan; Colburn, Trina; Chow, Eric J.	PEDIATRIC BLOOD {\&} CANCER	Background: Physical activity (PA) may be important for preventing chronic diseases for adolescent and young adult (AYA) childhood cancer survivors. Randomized controlled trials (RCTs) of PA interventions for AYA survivors are sparse, but necessary to determine effective programs for increasing PA among this population. Thus, we conducted a pilot RCT, testing the feasibility of a mobile health (m…	2017	US	14-18 post cancer therapy survivors	60	Randomised controlled trial, pilot study	10 week	Rewards, monitoring, socialisation	Fitbit Flex + Fitbit flex mobile app + facebook group	Wearable + mobile app + social media	accelerometer	step count	mobile app, Facebook group	Improve physical activity level	Young cancer survivors, research staff	Generalised linear mixed model using SAS 9.4 (SAS Institute Inc., Cary, NC)	Moderate-to-vigorous physical activity (min.day), sedentary time (min/day), patient-reported experience (helpfulness of intervention for PA awareness, setting personalised goals, motivation and joining virtual community of survivors with common goal)	Consent from participants, institutional ethics board approval	N/A
13	O'Malley 2014	A smartphone intervention for adolescent obesity: study protocol for a randomised controlled non-inferiority trial.	O'Malley, Grace; Clarke, Mike; Burls, Amanda; Murphy, Sinead; Murphy, Nuala; Perry, Ivan J.	Trials	BACKGROUND: There are few evidence-based mobile health solutions for treating adolescent obesity. The primary aim of this parallel non-inferiority trial is to assess the effectiveness of an experimental smartphone application in reducing obesity at 12 months, compared to the Temple Street W82GO Healthy Lifestyles intervention., METHODS/DESIGN: The primary outcome measure is change in body mass in…	2014	Ireland	12-17	10	randomised controlled non-inferiority trial, trial protocol	12 months	Feedback, social comparison, social reward & support, goal setting and review, action planning, education, self-monitoring	Reactivate (mobile app)	Android mobile app	self-report	Mood survey, goals, height and weight	Mobile app message board, stored in password-protected fire-walled computers accessible only to research team and software managers	Adapt face-to-face obesity interventions for mobile platform and deliver secure and effective care remotely. Improve health	Hospital (paediatrician, dietitian, physiotherapist, psychologist), adolescent obese patients	statistical analyses performed using SPSS (version 20, IBM, NY, USA)	Anthropometric parameters (weight, height, BMI), blood sample analysis, insulin resistance, blood pressure, physical activity, cardiorespiratory fitness, muscoskeletal screen, health-related quality of life, psychosocial health, technical effectiveness, relative user efficiency, user satisfaction	University Hospital Ethics Board approved, data managed in accordance with hospital and UCC data protection policies	N/A
14	Phan 2018	Feasibility of Using a Commercial Fitness Tracker as an Adjunct to Family-Based Weight Management Treatment: Pilot Randomized Trial.	Phan, Thao-Ly Tam; Barnini, Nadia; Xie, Sherlly; Martinez, Angelica; Falini, Lauren; Abatemarco, Atiera; Waldron, Maura; Benton, Jane M.; Frankenberry, Steve; Coleman, Cassandra; Nguyen, Linhda; Bo, Cindy; Datto, George A.; Werk, Lloyd N.	JMIR mHealth and uHealth	BACKGROUND: Fitness trackers can engage users through automated self-monitoring of physical activity. Studies evaluating the utility of fitness trackers are limited among adolescents, who are often difficult to engage in weight management treatment and are heavy technology users. OBJECTIVE: We conducted a pilot randomized trial to describe the impact of providing adolescents and caregivers with f…	2018	US	13-17	90	Pilot randomised trial	3 months	Feedback, positive reinforcement such as rewards and challenges, goal setting, self-monitoring	Fitness tracker	wearable + webpage	accelerometer	physical activity and sleep	Wireless sync to computers and smartphones	Improve physical activity	Adolescents, caregivers, weight management clinics	data analysed and viewable through a web-based dashboard or mobile device app operated by the device manufacturer. Statistical software R was used for the trial data analysis	- fitness tracker utilisation - daily steps on valid device days - daily minutes of moderate to vigorous physical activity on valid device - daily calories burned on valid device	Institutional review board and consent from adolescent and caregivers	N/A
15	Ridgers 2018	Wearable activity tracker use among Australian adolescents: Usability and acceptability study	Ridgers, N.D.; Timperio, A.; Brown, H.; Ball, K.; Macfarlane, S.; Lai, S.K.; Richards, K.; Mackintosh, K.A.; McNarry, M.A.; Foster, M.; Salmon, J.	Journal of Medical Internet Research	Background: Wearable activity trackers have the potential to be integrated into physical activity interventions, yet little is known about how adolescents use these devices or perceive their acceptability. Objective: The aim of this study was to examine the usability and acceptability of a wearable activity tracker among adolescents. A secondary aim was to determine adolescents' awareness and use…	2018	Australia	13-14	60	Usability and acceptability study	6 weeks	self-monitoring, feedback, prompts and cues, rewards, goal-setting, social comparison	Fitbit Flex	wearable	accelerometer	minute-by-minute real-time information on steps taken, estimated energy expenditure, physical activity intensities, and sleep	Wirelessly sync to web-based account (typically through a smartphone or Fitbit connect)	Improve physical activity	Adolescents, researchers	Web-based portal allow wearers to view and track personal statistics	Qualitative insights from subjects regarding views on the acceptability and usability of the different features and functions, potential facilitators or barriers to ongoing use, thoughts on impact of Fitbit on overall activity levels	Institutional review board and the Victorian Department of Education and training	N/A
16	Ridgers, 2017	A cluster-randomised controlled trial to promote physical activity in adolescents: the Raising Awareness of Physical Activity (RAW-PA) Study.	Ridgers, Nicola D.; Timperio, Anna; Brown, Helen; Ball, Kylie; Macfarlane, Susie; Lai, Samuel K.; Richards, Kara; Ngan, Winsfred; Salmon, Jo	BMC public health	BACKGROUND: Recent technological advances provide an alternative yet underutilised opportunity for promoting physical activity in youth. The primary aim of the Raising Awareness of Physical Activity (RAW-PA) Study is to examine the short- and longer-term impact of a wearable activity monitor combined with digital behaviour change resources on adolescents' daily physical activity levels. METHODS/D…	2017	Australia	13-14	300	Cluster randomised controlled trial	12 weeks	self-monitoring, feedback, prompts and cues, rewards, goal-setting, social comparison	Fitbit Flex	wearable	accelerometer	minute-by-minute real-time information on steps taken, estimated energy expenditure, physical activity intensities, and sleep	Wirelessly sync to web-based account (typically through a smartphone or Fitbit connect). Fitabase, a commercially-available platform for collecting these data from multiple users	Improve physical activity	Adolescents, researchers	Web-based portal allow wearers to view and track personal statistics	Self-reported measures such as: - Number of days physically active - Time spent on sedentary behavior - Usual mode of transport - Self-efficacy - Social support	Institutional review board and the Victorian Department of Education and training	N/A
17	Svensson 2015	A Mobile Phone App for Dietary Intake Assessment in Adolescents: An Evaluation Study.	Svensson, Asa; Larsson, Christel	JMIR mHealth and uHealth	BACKGROUND: There is a great need for dietary assessment methods that suit the adolescent lifestyle and give valid intake data. OBJECTIVE: To develop a mobile phone app and evaluate its ability to assess energy intake (EI) and total energy expenditure (TEE) compared with objectively measured TEE. Furthermore, to investigate the impact of factors on reporting accuracy of EI, and to compare dietary…	2015	Sweden	14-16	81	Evaluation study	1-6 days	Self-monitoring	SenseWear Armband, mobile app, SenseWear Professional version 6.1 webpage	wearable + mobile app + webpage	accelerometer, UV sensor, galvanic skin response	physical activity, heat flux, near-body and skin temperature, galvanic skin response	App communicates with the Web project via Wifi or 3G	Understand dietary intake and total energy expenditure	Adolescents, National Food Agency in Sweden	Energy and nutrient content data computed and stored in SQL database, statistical analyses performed with IBM SPSS version 21	- Accuracy of assessment of total energy expenditure of users	Approved by the regional ethical review board, written informed consent	Declaration of Helsinki
18	Taki 2019	A Mixed Methods Study to Explore the Effects of Program Design Elements and Participant Characteristics on Parents' Engagement With an mHealth Program to Promote Healthy Infant Feeding: The Growing Healthy Program.	Taki, Sarah; Russell, Catherine Georgina; Lymer, Sharyn; Laws, Rachel; Campbell, Karen; Appleton, Jessica; Ong, Kok-Leong; Denney-Wilson, Elizabeth	Frontiers in endocrinology	Purpose: Mobile health (mHealth) interventions have great potential to promote health. To increase consumer engagement in mHealth interventions it is necessary to address factors that influence the target demographic. The Growing healthy (GH) program is the first obesity prevention program delivered via a smartphone app and website offering evidence-based information on infant feeding from birth …	2019	Australia	infants ~9 months of age and their mothers	225	Mixed Methods Study	9 months	prompts and cues, socialisation	Growing healthy app	mobile app + webpage	N/A	N/A	Push notifications sent in the phone app	- Encourage infant feeding bahaviors that promote healthy rather than excess weight gain - Promote breastfeeding - Promote best practice formula feeding - Delay introduction of solids to around 6 months of age but not before 4 months - Promote healthy first foods - Promote healthy infant feeding practices - Optimise infant dietary exposure to fruit and vegetables	Parents, infants	N/A	Engagement index and participant experience	Institutional review board and participant consent	N/A
19	Turel 2016	Health Outcomes of Information System Use Lifestyles among Adolescents: Videogame Addiction, Sleep Curtailment and Cardio-Metabolic Deficiencies	Turel, Ofir; Romashkin, Anna; Morrison, Katherine M.	PLOS ONE	Background and Objective Obesity is a rising problem among adolescents in modern societies; it results in long-term cardio-metabolic problems. Possible overlooked drivers of obesity and its consequent cardio-metabolic deficits include videogame addiction and the resulting curtailed sleep; both are growing problems among adolescents. The objective of this study is to examine possible associations …	2016	US	10-17	94	cohort study	1 week	Monitoring	Fitbit	wearable	sleep monitor	sleep duration	not mentioned	- Examine associations among videogame addiction, sleep patterns and obesity	Adolescents, obesity clinics	Structual equation modeling (SEM) analyses and bootstrapping-nased mediation testing procedures	videogame addiction, obesity level	Institutional review board and participant consent	N/A
20	Yang 2017	Interventions for Preventing Childhood Obesity with Smartphones and Wearable Device: A Protocol for a Non-Randomized Controlled Trial.	Yang, Hye Jung; Kang, Jae-Heon; Kim, Ok Hyun; Choi, Mona; Oh, Myungju; Nam, Jihyun; Sung, Eunju	International journal of environmental research and public health	BACKGROUND: Childhood obesity is a critical health issue, both currently and forthe foreseeable future. To prevent obesity, behavior changes are essential. Smartphones can be a good tool, as the number of child smartphone users is rapidly increasing. We have developed a mobile platform system named HAPPY ME	2017	Korea	2019-12-10	823	Non-randomised controlled trial	9 months	gamification, self-monitoring	"HAPPY ME" for students/parents/teachers platform, Walkie + D Coffee (Green Cross Healthcare Inc., South Korea)	mobile app + wearable	accelerometer	step count, calorie count, screen-time monitoring	wearable connect to mobile app via bluetooth	- Student self-monitoring of dietary habits, screen time, sleep duration and physical activities - Parents receive feedback from the platform and to monitor their child's dietary habits and physical activity - Teachers to encourage students to improve healthy behaviors	Students, parents, teachers	Statistical analysis software SPSS	Primary outcome measures: behavioral changes, including healthy eating, increased physical activity, and fitness. Secondary outcome measures: changes in anthropometric parameters (body weight, height, body mass index z-score, and waist circumference), BMI percentiles (obesity rate), and psychological perceptions among participants	Institutional review board and participant consent	N/A
21	Tripicchio 2017	Technology Components as Adjuncts to Family-Based Pediatric Obesity Treatment in Low-Income Minority Youth.	Tripicchio, Gina L.; Ammerman, Alice S.; Neshteruk, Cody; Faith, Myles S.; Dean, Kelsey; Befort, Christie; Ward, Dianne S.; Truesdale, Kimberly P.; Burger, Kyle S.; Davis, Ann	Childhood obesity (Print)	BACKGROUND: Strategies to treat pediatric obesity are needed, especially among high-need populations. Technology is an innovative approach; however, data on technology as adjuncts to in-person treatment programs are limited. METHODS: A total of 64 children [body mass index (BMI) {\textgreater}/=85th percentile, mean age = 9.6 +/- 3.1 years, 32.8{\%} female, 84.4{\%} Hispanic] were recruited to pa…	2014-2015	US	2-18	64	Non-randomised controlled trial	12 weeks	goal setting, self-monitoring, parent role modeling, diet/physical activity/lifestyle modification), feedback	FITNET physical activity app	Mobile app	N/A	Physical activity per day, FITNET usage	Via app	Children and families need health counselling Pediatric clinics want to provide tailored treatment support to families in less accessible areas	Children, families, pediatric clinics	T-tests and chi-squared tests assessed differences at baseline between cohorts, and be- tween completers and noncompleters postintervention. Linear regression models were used to examine BMI-z change for each cohort (FBBG, TECH1, and TECH2)	- Child BMI z-Score - Treatment acceptability	Institutional review board and participant consent	N/A
22	Vazquez-Briseno, 2012	A proposal for using the internet of things concept to increase children's health awareness	Vazquez-Briseno, M.; Navarro-Cota, C.; Nieto-Hipolito, J.I.; Jimenez-Garcia, E.; Sanchez-Lopez, J.D.	CONIELECOMP 2012, 22nd International Conference on Electrical Communications and Computers	Childhood obesity has become a major problem around the world. In many cases children develop unhealthy eating patterns, resulting in excess energy intake, because they eat alone without their parents or teachers advice. In this paper we propose a mobile health (mhealth) platform intended to increase children's health awareness by tracking their food intake and sending proper notifications and me…	2012	Mexico	6-13	15	Pilot study	Not mentioned	Self-monitoring, feedback	Mobile app + platform	mobile app	QR-reader	food information	QR codes, internet/ HTTP/MMS	Children: track food consumption Parents: Send and receive appropraite feedback Health educator: Collect and analyse children's diets, send alarms and short motivational messages to user when required.	Children, parents, health educator	Stored in user's electronic health record	barcode readers acceptance	N/A	N/A
23	Alloghani, 2016	A Mobile Health Monitoring Application for Obesity Management and Control Using the Intemet-of-Things	Alloghani, Mohamed; Hussain, Abir; Al-Jumeily, Dhiya; Fergus, Paul; Abuelma'atti, Omar; Hamden, Hani	2016 SIXTH INTERNATIONAL CONFERENCE ON DIGITAL INFORMATION PROCESSING AND COMMUNICATIONS (ICDIPC)	Obesity is one of the most serious and dangerous nutrition disorder around the world. Usually, people develop patterns of unhealthy eating that lead to increased body weight and accumulation of fat in the body. There are many reasons for that as suggested by researchers; one of the reasons is the imbalance between the energy intake from food and energy consumed in the body, which can possibly lea…	2016	UK	13+	N/A	N/A	N/A	Self-monitoring, feedback	Mobile app	Mobile app	Sensors in devices	Data from IoT attached objects such as the fitness tracking device, blood pressure instrument, medical weight scale	uploaded to the system backend wirelessly/ via bluetooth	Patients to track children's health status Health professionals to encourage positive health behaviors Children: improve health	Children, parents, health professionals	Can be viewed by health doctors through portal system as tabular and graphical ways	Mutual relationship of system's measurement variables that include trust, security, ease of use and usefulness	N/A	N/A
